# Supplementary material for: Relationships between the concentration of particulate organic nitrogen and the inherent optical properties of seawater in oceanic surface waters
Source: Copernicus journal article supplement (doi:10.5194/egusphere-2024-2218), 2024-07-23
Supplement: Supplementary file 1 [file egusphere-2024-2218-supplement.pdf]

# Relationships between the concentration of particulate organic nitrogen and the inherent optical properties of seawater in oceanic surface waters

5 Alain Fumenia<sup>1</sup>, Hubert Loisel<sup>1</sup>, Rick A. Reynolds<sup>2</sup>, and Dariusz Stramski<sup>2</sup>

<sup>1</sup>Laboratoire d'Océanologie et de Géosciences, Université du Littoral Côte d'Opale, Université Lille, CNRS, IRD, UMR 8187, LOG, Wimereux, France

10 <sup>2</sup>Marine Physical Laboratory, Scripps Institution of Oceanography, University of California San Diego, La Jolla, California 92093-0238, USA

*Correspondence to:* Alain Fumenia (alain.fumenia@univ-littoral.fr)

## Contents of this file

Tables S1 to S5

15 The supporting information provides the best-fit coefficients and their standard deviation of the relationships between PON and IOPs for the open-ocean dataset (Table S1) and the whole dataset (Table S2 and S3). In addition, the supporting information includes the slope ( $S$ ), intercept ( $I$ ), and statistical metrics of the relationships between PON derived from IOP-based algorithms and measured PON for the open-ocean dataset (Table S4) and the whole dataset (Table S5).

20

25

**Table S1. Best-fit coefficients of the relationships between PON ( $\text{mg m}^{-3}$ ) and IOPs( $\lambda$ ) ( $\text{m}^{-1}$ ) for the open-ocean dataset (OOD).  $R^2$  is the coefficient of determination and  $N$  the number of samples.**

| $\text{PON} = A \text{ IOP}(\lambda)^B$ | $A$                       | $B$             | $R^2$ | $N$ |
|-----------------------------------------|---------------------------|-----------------|-------|-----|
| $\text{PON} = A b_{\text{bp}}(442)^B$   | $245739.14 \pm 260832.07$ | $1.51 \pm 0.10$ | 0.75  | 70  |
| $\text{PON} = A b_{\text{bp}}(510)^B$   | $206544.76 \pm 196112.79$ | $1.44 \pm 0.09$ | 0.80  | 63  |
| $\text{PON} = A b_{\text{bp}}(555)^B$   | $105514.11 \pm 72139.11$  | $1.31 \pm 0.07$ | 0.84  | 74  |
| $\text{PON} = A a_{\text{p}}(412)^B$    | $246.10 \pm 54.57$        | $0.73 \pm 0.03$ | 0.87  | 71  |
| $\text{PON} = A a_{\text{p}}(442)^B$    | $229.69 \pm 50.62$        | $0.74 \pm 0.03$ | 0.86  | 71  |
| $\text{PON} = A a_{\text{p}}(490)^B$    | $284.23 \pm 61.70$        | $0.71 \pm 0.03$ | 0.88  | 71  |
| $\text{PON} = A a_{\text{p}}(510)^B$    | $356.71 \pm 79.86$        | $0.69 \pm 0.03$ | 0.89  | 71  |
| $\text{PON} = A a_{\text{p}}(555)^B$    | $468.23 \pm 127.04$       | $0.62 \pm 0.03$ | 0.86  | 69  |
| $\text{PON} = A a_{\text{p}}(670)^B$    | $265.76 \pm 66.94$        | $0.56 \pm 0.03$ | 0.84  | 71  |
| $\text{PON} = A a_{\text{ph}}(412)^B$   | $223.93 \pm 57.02$        | $0.65 \pm 0.04$ | 0.82  | 71  |
| $\text{PON} = A a_{\text{ph}}(442)^B$   | $215.76 \pm 54.12$        | $0.68 \pm 0.04$ | 0.82  | 71  |
| $\text{PON} = A a_{\text{ph}}(490)^B$   | $259.53 \pm 65.26$        | $0.66 \pm 0.03$ | 0.84  | 71  |
| $\text{PON} = A a_{\text{ph}}(510)^B$   | $310.04 \pm 81.39$        | $0.62 \pm 0.03$ | 0.84  | 71  |
| $\text{PON} = A a_{\text{ph}}(555)^B$   | $309.01 \pm 92.82$        | $0.49 \pm 0.03$ | 0.80  | 69  |
| $\text{PON} = A a_{\text{ph}}(670)^B$   | $249.45 \pm 66.11$        | $0.53 \pm 0.03$ | 0.82  | 71  |
| $\text{PON} = A a_{\text{d}}(412)^B$    | $1195.9 \pm 601.35$       | $0.85 \pm 0.06$ | 0.74  | 71  |
| $\text{PON} = A a_{\text{d}}(442)^B$    | $1264.5 \pm 693.80$       | $0.82 \pm 0.06$ | 0.71  | 71  |
| $\text{PON} = A a_{\text{d}}(490)^B$    | $1212.0 \pm 756.50$       | $0.75 \pm 0.07$ | 0.65  | 71  |
| $\text{PON} = A a_{\text{d}}(510)^B$    | $1109.51 \pm 711.43$      | $0.72 \pm 0.07$ | 0.63  | 71  |
| $\text{PON} = A a_{\text{d}}(555)^B$    | $878.97 \pm 617.02$       | $0.64 \pm 0.07$ | 0.56  | 71  |
| $\text{PON} = A a_{\text{d}}(670)^B$    | $251.02 \pm 185.26$       | $0.41 \pm 0.06$ | 0.38  | 71  |

**Table S2. Best-fit coefficients of the relationships between PON (mg m<sup>-3</sup>) and  $b_{bp}(\lambda)$  (m<sup>-1</sup>) for the whole dataset (WD).  $R^2$  is the coefficient of determination and  $N$  the number of samples.**

|                                                                                                                             | $a_0$ | $a_1$ | $a_2$ | $a_3$ | $R^2$ | $N$ |
|-----------------------------------------------------------------------------------------------------------------------------|-------|-------|-------|-------|-------|-----|
| $\log_{10}(\text{PON}) = a_0 + a_1(\log_{10}(b_{bp}(442))) + a_2(\log_{10}(b_{bp}(442)))^2 + a_3(\log_{10}(b_{bp}(442)))^3$ | 2.21  | 0.57  | 0.34  | 0.10  | 0.60  | 289 |
| $\log_{10}(\text{PON}) = a_0 + a_1(\log_{10}(b_{bp}(510))) + a_2(\log_{10}(b_{bp}(510)))^2 + a_3(\log_{10}(b_{bp}(510)))^3$ | 2.63  | 1.40  | 0.74  | 0.15  | 0.62  | 279 |
| $\log_{10}(\text{PON}) = a_0 + a_1(\log_{10}(b_{bp}(555))) + a_2(\log_{10}(b_{bp}(555)))^2 + a_3(\log_{10}(b_{bp}(555)))^3$ | 2.62  | 1.32  | 0.68  | 0.14  | 0.63  | 284 |

**Table S3. Best-fit coefficients of the relationships between PON (mg m<sup>-3</sup>) and the spectral absorption coefficients (m<sup>-1</sup>) of different seawater particulate constituents for the whole dataset (WD). *R*<sup>2</sup> is the coefficient of determination and *N* the number of samples.**

| $\text{PON} = A \text{ IOP}a(\lambda)^B$ | <i>A</i>        | <i>B</i>    | <i>R</i> <sup>2</sup> | <i>N</i> |
|------------------------------------------|-----------------|-------------|-----------------------|----------|
| $\text{PON} = A a_p(412)^B$              | 134.53 ± 8.32   | 0.62 ± 0.02 | 0.80                  | 392      |
| $\text{PON} = A a_p(442)^B$              | 152.42 ± 9.50   | 0.65 ± 0.02 | 0.82                  | 392      |
| $\text{PON} = A a_p(490)^B$              | 221.56 ± 16.02  | 0.67 ± 0.02 | 0.82                  | 392      |
| $\text{PON} = A a_p(510)^B$              | 254.27 ± 19.62  | 0.64 ± 0.02 | 0.82                  | 392      |
| $\text{PON} = A a_p(555)^B$              | 326.86 ± 30.76  | 0.59 ± 0.02 | 0.79                  | 389      |
| $\text{PON} = A a_p(670)^B$              | 278.87 ± 21.81  | 0.59 ± 0.01 | 0.83                  | 392      |
| $\text{PON} = A a_{ph}(412)^B$           | 209.99 ± 16.29  | 0.63 ± 0.02 | 0.79                  | 392      |
| $\text{PON} = A a_{ph}(442)^B$           | 220.73 ± 16.96  | 0.67 ± 0.02 | 0.80                  | 392      |
| $\text{PON} = A a_{ph}(490)^B$           | 323.53 ± 27.80  | 0.69 ± 0.02 | 0.82                  | 392      |
| $\text{PON} = A a_{ph}(510)^B$           | 359.60 ± 31.47  | 0.64 ± 0.02 | 0.82                  | 392      |
| $\text{PON} = A a_{ph}(555)^B$           | 363.03 ± 35.65  | 0.52 ± 0.01 | 0.79                  | 389      |
| $\text{PON} = A a_{ph}(670)^B$           | 273.66 ± 21.93  | 0.55 ± 0.01 | 0.82                  | 392      |
| $\text{PON} = A a_d(412)^B$              | 184.38 ± 16.10  | 0.55 ± 0.02 | 0.73                  | 392      |
| $\text{PON} = A a_d(442)^B$              | 223.29 ± 21.18  | 0.55 ± 0.02 | 0.73                  | 392      |
| $\text{PON} = A a_d(490)^B$              | 303.97 ± 34.60  | 0.56 ± 0.02 | 0.70                  | 392      |
| $\text{PON} = A a_d(510)^B$              | 351.94 ± 42.41  | 0.57 ± 0.02 | 0.70                  | 392      |
| $\text{PON} = A a_d(555)^B$              | 504.51 ± 72.94  | 0.58 ± 0.02 | 0.68                  | 392      |
| $\text{PON} = A a_d(670)^B$              | 787.80 ± 160.15 | 0.56 ± 0.02 | 0.58                  | 392      |

45

50

55 Table S4. Slope ( $S$ ), intercept ( $I$ ), and statistical metrics of the relationships between PON derived from IOP-based algorithms and measured PON for the open-ocean dataset (OOD).  $RMSD$  is the Root Mean Square Deviation ( $\text{mg m}^{-3}$ ),  $MdB$  the Median Bias ( $\text{mg m}^{-3}$ ),  $MdR$  the Median Ratio,  $MdAPD$  the Median Absolute Percentage Difference (%),  $MdSA$  the Median Symmetric Accuracy (%), and  $N$  the number of samples.

|               | $S$  | $I$   | $R$  | $RMSD$ | $MdB$ | $MdR$ | $MdAPD$ | $MdSA$ | $N$ |
|---------------|------|-------|------|--------|-------|-------|---------|--------|-----|
| $b_{bp}(442)$ | 1.06 | -0.07 | 0.87 | 6.35   | 0.34  | 1.01  | 28.56   | 35.41  | 70  |
| $b_{bp}(510)$ | 1.04 | -0.04 | 0.90 | 4.30   | 0.56  | 1.07  | 20.11   | 22.02  | 63  |
| $b_{bp}(555)$ | 1.02 | -0.03 | 0.92 | 6.17   | 0.28  | 1.05  | 23.68   | 28.30  | 74  |
| $a_p(412)$    | 0.98 | 0.02  | 0.93 | 4.57   | 0.06  | 1.01  | 18.08   | 19.84  | 71  |
| $a_p(442)$    | 0.98 | 0.02  | 0.93 | 4.81   | 0.31  | 1.04  | 18.29   | 21.50  | 71  |
| $a_p(490)$    | 0.98 | 0.04  | 0.94 | 4.46   | 0.31  | 1.03  | 17.99   | 19.88  | 71  |
| $a_p(510)$    | 0.98 | 0.02  | 0.94 | 4.39   | 0.10  | 1.03  | 18.91   | 19.56  | 71  |
| $a_p(555)$    | 0.97 | 0.03  | 0.93 | 4.79   | -0.09 | 0.98  | 20.21   | 24.51  | 69  |
| $a_p(665)$    | 0.95 | 0.05  | 0.92 | 5.35   | -0.10 | 0.98  | 18.76   | 21.18  | 71  |
| $a_{ph}(412)$ | 0.96 | 0.05  | 0.91 | 4.63   | 0.22  | 1.04  | 17.64   | 18.69  | 71  |
| $a_{ph}(442)$ | 0.96 | 0.04  | 0.91 | 4.85   | 0.28  | 1.04  | 18.81   | 18.88  | 71  |
| $a_{ph}(490)$ | 0.96 | 0.03  | 0.92 | 4.48   | 0.22  | 1.01  | 18.81   | 19.56  | 71  |
| $a_{ph}(510)$ | 0.96 | 0.04  | 0.92 | 4.32   | 0.25  | 1.03  | 17.42   | 18.65  | 71  |
| $a_{ph}(555)$ | 0.93 | 0.07  | 0.90 | 4.55   | 0.42  | 1.04  | 17.66   | 17.66  | 69  |
| $a_{ph}(665)$ | 0.94 | 0.06  | 0.91 | 5.19   | 0.20  | 1.04  | 19.45   | 19.80  | 71  |
| $a_d(412)$    | 0.97 | 0.03  | 0.86 | 7.14   | -0.04 | 0.99  | 30.44   | 34.20  | 71  |
| $a_d(442)$    | 0.96 | 0.04  | 0.84 | 7.60   | 0.22  | 1.03  | 31.98   | 36.90  | 71  |
| $a_d(490)$    | 0.94 | 0.06  | 0.81 | 8.35   | 0.30  | 1.07  | 35.83   | 42.91  | 71  |
| $a_d(510)$    | 0.92 | 0.08  | 0.79 | 8.58   | 0.46  | 1.07  | 37.21   | 40.62  | 71  |
| $a_d(555)$    | 0.87 | 0.13  | 0.75 | 9.20   | 0.63  | 1.10  | 38.90   | 54.67  | 69  |
| $a_d(665)$    | 0.63 | 0.36  | 0.62 | 10.83  | 0.72  | 1.12  | 47.09   | 58.05  | 71  |

60

65

**Table S5.** Slope ( $S$ ), intercept ( $I$ ), and statistical metrics of the relationships between PON derived from IOP-based algorithms and measured PON for the whole dataset (WD).  $RMSD$  is the Root Mean Square Deviation ( $\text{mg m}^{-3}$ ),  $MdB$  the Median Bias ( $\text{mg m}^{-3}$ ),  $MdR$  the Median Ratio,  $MdAPD$  the Median Absolute Percentage Difference (%),  $MdSA$  the Median Symmetric Accuracy (%), and  $N$  the number of samples.

|               | $S$  | $I$  | $R$  | $RMSD$ | $MdB$ | $MdR$ | $MdAPD$ | $MdSA$ | $N$ |
|---------------|------|------|------|--------|-------|-------|---------|--------|-----|
| $b_{bp}(442)$ | 0.80 | 0.28 | 0.83 | 29.85  | 0.23  | 1.02  | 36.99   | 47.87  | 289 |
| $b_{bp}(510)$ | 0.80 | 0.27 | 0.83 | 28.91  | 0.65  | 1.04  | 34.50   | 38.79  | 279 |
| $b_{bp}(555)$ | 0.82 | 0.24 | 0.85 | 28.18  | 0.41  | 1.03  | 35.88   | 43.75  | 284 |
| $a_p(412)$    | 0.95 | 0.08 | 0.89 | 27.52  | -0.48 | 0.98  | 30.93   | 38.94  | 392 |
| $a_p(442)$    | 0.96 | 0.06 | 0.90 | 25.36  | 0.31  | 1.02  | 30.47   | 36.88  | 392 |
| $a_p(490)$    | 0.96 | 0.06 | 0.91 | 25.72  | 0.25  | 1.02  | 29.17   | 34.87  | 392 |
| $a_p(510)$    | 0.96 | 0.06 | 0.91 | 26.09  | -0.11 | 0.99  | 28.49   | 33.47  | 392 |
| $a_p(555)$    | 0.94 | 0.09 | 0.89 | 27.72  | 0.24  | 1.02  | 30.14   | 37.01  | 389 |
| $a_p(665)$    | 0.95 | 0.07 | 0.91 | 23.27  | 0.08  | 1.01  | 25.28   | 31.62  | 392 |
| $a_{ph}(412)$ | 0.95 | 0.08 | 0.89 | 24.77  | 0.05  | 1.00  | 30.30   | 37.58  | 392 |
| $a_{ph}(442)$ | 0.96 | 0.07 | 0.90 | 23.35  | 0.37  | 1.03  | 29.37   | 35.70  | 392 |
| $a_{ph}(490)$ | 0.96 | 0.06 | 0.90 | 23.77  | 0.33  | 1.03  | 29.29   | 33.57  | 392 |
| $a_{ph}(510)$ | 0.96 | 0.06 | 0.91 | 23.80  | 0.42  | 1.03  | 27.33   | 33.77  | 392 |
| $a_{ph}(555)$ | 0.93 | 0.11 | 0.89 | 26.82  | 0.61  | 1.03  | 28.28   | 33.94  | 389 |
| $a_{ph}(665)$ | 0.94 | 0.08 | 0.90 | 23.76  | -0.10 | 0.99  | 24.91   | 30.20  | 392 |
| $a_d(412)$    | 0.91 | 0.13 | 0.85 | 32.77  | 0.41  | 1.02  | 33.53   | 43.15  | 392 |
| $a_d(442)$    | 0.91 | 0.13 | 0.85 | 32.56  | 0.62  | 1.03  | 34.10   | 41.24  | 392 |
| $a_d(490)$    | 0.90 | 0.15 | 0.84 | 33.19  | 0.22  | 1.01  | 34.32   | 41.30  | 392 |
| $a_d(510)$    | 0.90 | 0.14 | 0.84 | 33.21  | 0.23  | 1.01  | 34.05   | 42.22  | 392 |
| $a_d(555)$    | 0.90 | 0.15 | 0.82 | 33.88  | -0.08 | 0.99  | 37.67   | 44.05  | 389 |
| $a_d(665)$    | 0.85 | 0.23 | 0.76 | 35.41  | 0.46  | 1.03  | 39.90   | 48.77  | 392 |
