# Supplementary material for: Relationships between the concentration of particulate organic nitrogen and the inherent optical properties of seawater in oceanic surface waters
Source: Copernicus journal article supplement (doi:10.5194/egusphere-2024-2218), 2024-07-23
Supplement: Supplementary file [file egusphere-2024-2218-AC2-supplement.pdf]

## Responses to Referee #2

“Relationships between the concentration of particulate organic nitrogen and the inherent optical properties of seawater in oceanic surface waters”

Author(s): Alain Fumenia, Hubert Loisel, Rick A. Reynolds and Dariusz Stramski

### *General Comments by Referee*

*This paper presents a comprehensive analysis of relationships between surface ocean PON and various IOPs and proposes various algorithms for the estimation of PON from IOPs obtainable from ocean colour remote sensing or more directly from in situ measurements. This paper exploits -to the best of my knowledge- the largest available dataset of concurrent IOP and PON measurements and covers open ocean, Arctic and coastal environments. The paper is very well written and logically structured. All aspect of this paper, from the writing, to the statistical analyses and discussion are very rigorous and complete; I have nothing to add to this work. I applaud the authors for their rigorous and comprehensive work on the estimation of PON in seawater and I look forward to follow-up work!*

**Response:** We thank Dr. Griet Neukermans for her review and positive feedback on our manuscript. We greatly appreciate your positive assessment of different aspects of our study and the quality of presentation of this work in our manuscript. This is highly encouraging and motivating to continue the pursuit of this line of research.
